# Supplementary material for: Cell Type- and Exposure-Specific Modulation of CD63/CD81-Positive and Tissue Factor-Positive Extracellular Vesicle Release in response to Respiratory Toxicants
Source: Hindawi journal article supplement (doi:10.1155/2019/5204218), 2019-08-14
Supplement: f1 [file 5204218.f1.pdf]

**Supplementary table 1** Overview of materials with the respective providers and catalogue numbers

| Product                                                            | Provider                                                                           | Catalogue number |
|--------------------------------------------------------------------|------------------------------------------------------------------------------------|------------------|
| BEAS-2B cells                                                      | ATCC                                                                               | CRL-909          |
| MRC-5 cells                                                        | ATCC                                                                               | CCL-171          |
| HEL-299 cells                                                      | ATCC                                                                               | CCL-137          |
| THP-1 cells                                                        | ATCC                                                                               | TIB-202          |
| HPMEC-ST1.6R cells                                                 | Dr. C.J. Kirkpatrick lab, Institute for Pathology,<br>University of Mainz, Germany | -                |
| MycoAlert™ Mycoplasma Detection Kit                                | Lonza                                                                              | LT07-118         |
| Minimal Essential Medium (MEM), no glutamine                       | Gibco                                                                              | 21090            |
| Minimal Essential Medium Non-Essential Amino Acids (100X Solution) | MP Biomedicals LLC                                                                 | 1681049          |
| L-Glutamine (200mM)                                                | Thermo Fisher Scientific                                                           | 25030081         |
| Fetal calf serum (FCS)                                             | Biowest                                                                            | S181G            |
| RPMI 1640                                                          | Gibco                                                                              | 52400            |
| β-mercaptoethanol                                                  | Sigma-Aldrich                                                                      | M3148            |
| Sodium pyruvate (100 mM)                                           | Thermo Fisher Scientific                                                           | 11360070         |
| Glucose                                                            | Sigma-Aldrich                                                                      | G7021            |
| MCDB 131 medium, no glutamine                                      | Thermo Fisher Scientific                                                           | 10372019         |
| Hydrocortisone                                                     | Sigma-Aldrich                                                                      | H0396            |
| human recombinant epidermal growth factor                          | Sigma-Aldrich                                                                      | 11376454001      |
| Penicillin-Streptomycin (10,000 U/mL)                              | Gibco                                                                              | 15140122         |
| Gelatin from bovine skin Type B                                    | Sigma-Aldrich                                                                      | G9391            |
| 24-well plates                                                     | Corning                                                                            | 3524             |
| 12-well plates                                                     | Corning                                                                            | 3513             |
| Phorbol 12-myristate 13-acetate (PMA)                              | Sigma-Aldrich                                                                      | P8139            |
| DMEM/F-12, HEPES, no phenol red                                    | Gibco                                                                              | 11039            |
| Bacitracin                                                         | Sigma-Aldrich                                                                      | 11702            |
| N-acetyl-L-cysteine                                                | Sigma-Aldrich                                                                      | A9165            |
| research reference cigarette                                       | University of Kentucky                                                             | 3R4F             |
| Dichloromethane                                                    | Sigma-Aldrich                                                                      | 270997           |
| PBS                                                                | Gibco                                                                              | 10010023         |
| Silica nanoparticles                                               | C&E Mineral Corp, King of Prussia, PA                                              | -                |
| Thiazolyl Blue Tetrazolium Bromide 98% (MTT)                       | Sigma-Aldrich                                                                      | M2128            |
| 4 μm aldehyde/sulphate latex beads 4% (w/v)                        | Thermo Fisher Scientific                                                           | A37304           |
| mouse anti-human CD81 Clone JS-81                                  | BD Biosciences                                                                     | 555675           |
| mouse anti-human CD63 clone H5C6                                   | BD Biosciences                                                                     | 556019           |
| mouse anti-human CD9 clone M-L13                                   | BD Biosciences                                                                     | 555370           |
| MES buffer                                                         | Sigma-Aldrich                                                                      | M1317            |
| phycoerythrin (PE)-labelled mouse anti-human TF/CD142 antibody     | BD Biosciences                                                                     | 550312           |
| phycoerythrin (PE)-labelled mouse anti-human CD81 antibody         | BD Biosciences                                                                     | 555676           |
| phycoerythrin (PE)-labelled mouse IgG1-k isotype control           | BD Biosciences                                                                     | 555749           |
| Ethylenediaminetetraacetic acid disodium salt (EDTA) dihydrate     | Sigma-Aldrich                                                                      | E5134            |
| Alexa-Fluopr 488 maleimide                                         | Thermo Fisher Scientific                                                           | A10254           |
| 5,5-Dimethyl-1-pyrroline N-oxide (DMPO)                            | Sigma-Aldrich                                                                      | D5766            |
| Ascorbate                                                          | Sigma-Aldrich                                                                      | 11140            |

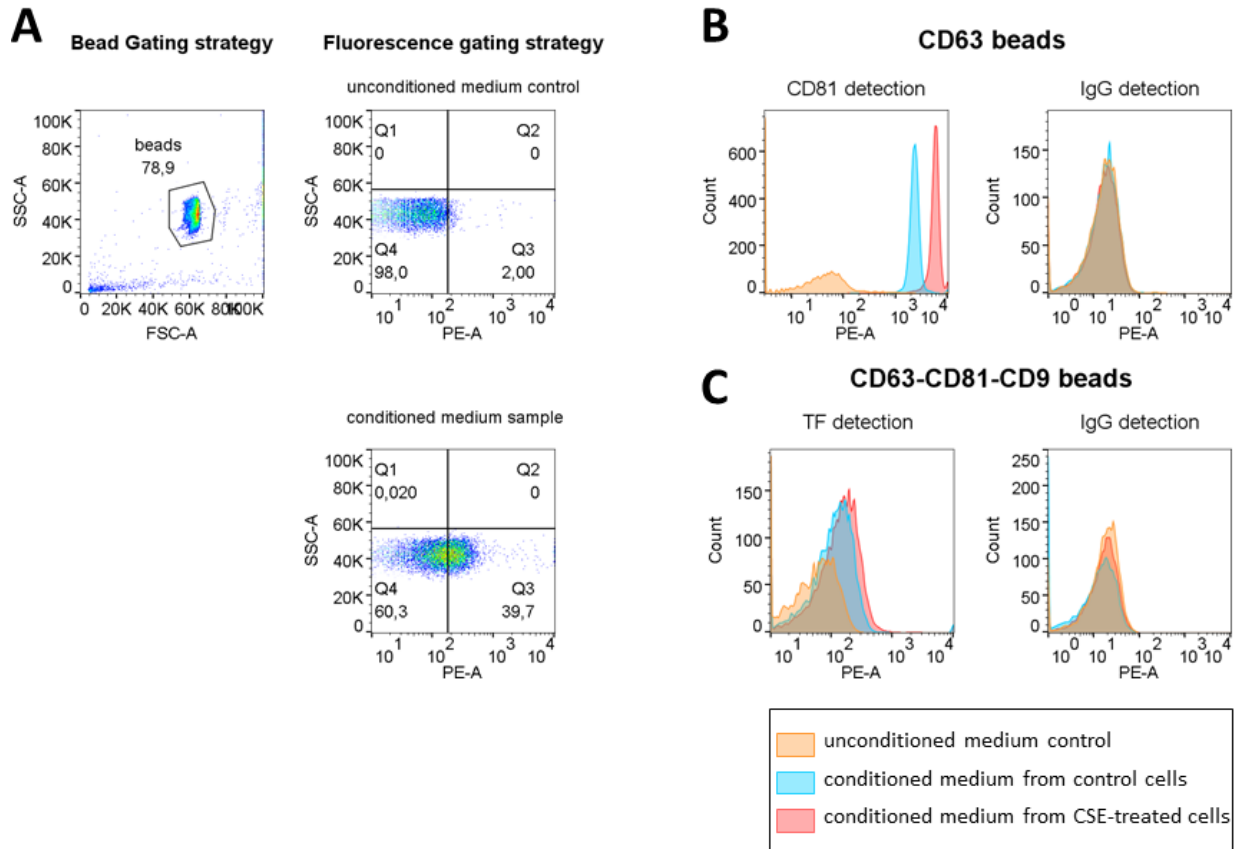

**Supplementary Figure 1** Raw data of EV detection by bead-based flow cytometry. Representative flow cytometry plots are shown for an unconditioned medium control and conditioned media samples of unexposed and CSE-exposed BEAS-2B cells. (A) Shows the gating strategy for the bead population. (B) Shows the specificity of fluorescence signal for the detection of the total EV population stained by anti-CD63 coated beads and a PE-labelled anti-CD81 detection antibody, compared to a PE-labelled isotype control. (C) Shows the specificity of the fluorescence signal for the detection of the TF-positive EV population stained by beads coated with a mixture of anti-CD63, anti-CD81 and anti-CD9 antibodies and a PE-labelled anti-TF detection antibody, compared to a PE-labelled isotype control.

**Supplementary table 2** Table for unit conversion for the PM exposure. PM samples were collected at 3 different locations with different levels of air pollution. To reflect the real life exposure at these locations, PM exposure was standardized per volume of filtered air rather than per weight of PM.

| PM sample            | $\mu\text{g PM}/\text{m}^3$ | $\text{cm}^2$ cell surface area / ml<br>of culture medium | $1 \text{ m}^3/\text{ml}$ in $\mu\text{g}/\text{cm}^2$ | $1.5 \text{ m}^3/\text{ml}$ in<br>$\mu\text{g}/\text{cm}^2$ |
|----------------------|-----------------------------|-----------------------------------------------------------|--------------------------------------------------------|-------------------------------------------------------------|
| PM <sub>2.5</sub> n1 | 50.3                        |                                                           | 13.2                                                   | 19.8                                                        |
| PM <sub>2.5</sub> n2 | 30.4                        |                                                           | 8.0                                                    | 12.0                                                        |
| PM <sub>2.5</sub> n3 | 30.8                        |                                                           | 8.1                                                    | 12.2                                                        |
| PM <sub>10</sub> n1  | 118.1                       | 3.4                                                       | 31.1                                                   | 46.6                                                        |
| PM <sub>10</sub> n2  | 71.25                       |                                                           | 18.8                                                   | 28.1                                                        |
| PM <sub>10</sub> n3  | 77.1                        |                                                           | 20.3                                                   | 30.4                                                        |
